# Supplementary material for: Brief communication: On the environmental impacts of 2023 flood in Emilia-Romagna (Italy)
Source: Copernicus journal article supplement (doi:10.5194/nhess-2023-184), 2023-10-27
Supplement: Supplementary file [file nhess-2023-184-RC1-supplement.pdf]

**nhess-2023-184-- Brief communication: On the environmental impacts of 2023 flood in Emilia-Romagna (Italy)**

This manuscript presents an in-depth analysis of the environmental impacts resulting from the 2023 flood in Emilia-Romagna. It highlights the often overlooked damages to natural ecosystems caused by flooding and emphasizes the necessity for a more in-depth understanding of these impacts. The overall quality of this manuscript is good, my comments are the following:

1. The manuscript emphasizes the difficulty in quantifying environmental impacts of flood. However, presenting a framework or proposing potential metrics, such as resilience-based measures, to assess environmental impacts and the recovery process could enhance the study's practical applicability.
2. Although this manuscript is focused on the 2023 flood in Emilia-Romagna, a comparative analysis with similar flood events or a discussion on global trends in this domain could enrich the discussion.
3. Further exploration of potential implications for policy-making and flood risk management strategies to prepare for and reduce the adverse impacts of flood to natural environment might be useful.
4. The inclusion of a deeper exploration of soil erosion and sedimentation in various environmental settings affected by the flood could enhance the manuscript's comprehensiveness.
5. There are a few instances of typo, a thorough proofreading would enhance the overall readability of the manuscript.
